# Supplementary material
Source: Springer Nature journal article supplement (https://www.springermedizin.de/resource/supplementary/12893_2013_467_MOESM4_ESM.pdf/9512498)

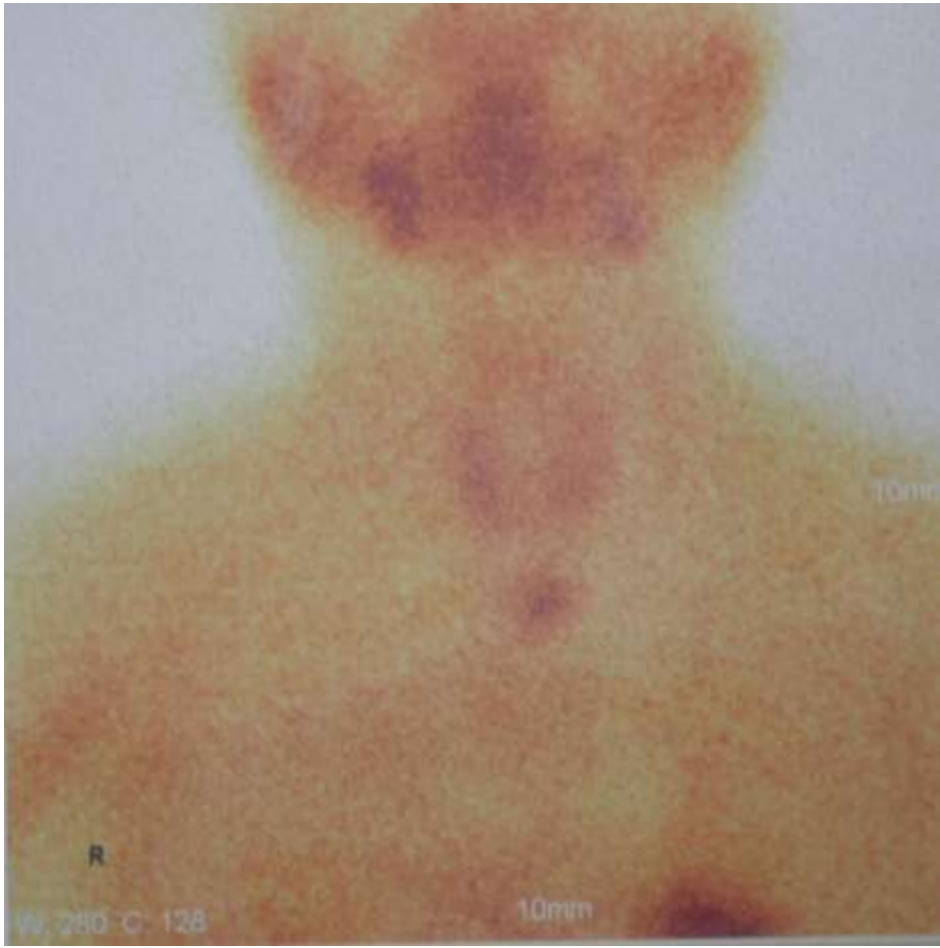

10mm

R

10mm

W. 280 C. 128

Supplement: MOESM4 [file 9512498]
